# Supplementary material
Source: publisher figshare collection journal article supplement (https://sage.figshare.com/ndownloader/files/13765304)
Supplement: Supplementary file 1 [file 13765304]

## **Early developmental risk for subsequent childhood mental disorders in an Australian population cohort.**

Melissa J. Green<sup>1,2</sup>, Stacy Tzoumakis<sup>3</sup>, Kristin R. Laurens<sup>1,4</sup>, Kimberlie Dean<sup>1,5</sup>, Maina Kariuki<sup>1</sup>, Felicity Harris<sup>1</sup>, Sally A. Brinkman<sup>6,7</sup>, Vaughan J. Carr<sup>1,2,8</sup>.

### **Author Affiliations**

1. School of Psychiatry, University of New South Wales, Sydney, Australia
2. Neuroscience Research Australia, Sydney, Australia
3. School of Social Sciences, University of New South Wales, Sydney, Australia
4. School of Psychology and Counselling, Queensland University of Technology, Brisbane, Australia.
5. Justice Health & Forensic Mental Health Network, NSW, Australia
6. Telethon Kids Institute, University of Western Australia, Perth, Australia
7. School of Population Health, University of Adelaide, Adelaide, Australia
8. Department of Psychiatry, School of Clinical Sciences, Monash University, Melbourne, Australia

### **Online Supplementary Materials**

|                                                                                                                                                                                                                                                              |   |
|--------------------------------------------------------------------------------------------------------------------------------------------------------------------------------------------------------------------------------------------------------------|---|
| Table S1. Examples of items comprising the 16 subdomains (within 5 broad domains) of the AEDC (child developmental vulnerability) indicators .....                                                                                                           | 2 |
| Table S2: Model fit statistics for identifying the latent class baseline model (n=82,891) .....                                                                                                                                                              | 3 |
| Table S3: Mean posterior probabilities and Item-response probabilities for the 4-class model of developmental vulnerability in 82,891 children.....                                                                                                          | 4 |
| Table S4: ICD-10 codes used to define mental diagnoses of parents of the child cohort (n=86,668; categories are not mutually exclusive).....                                                                                                                 | 5 |
| Table S5: ICD-10 codes used to define Mental Health conditions experienced by the child cohort <sup>a</sup> (categories are not mutually exclusive).....                                                                                                     | 6 |
| Table S6. Prevalence of Early Childhood (AEDC) Risk Categories, diagnosed mental disorder (between age 6-13 years), and covariates for the sample of 85,107 children who had no record of diagnosis with a mental disorder before age 5-6 years .....        | 7 |
| Table S7: Unadjusted Odds ratios (and 95% Confidence Intervals) for 'any' and specific mental disorder diagnoses among 85,107 children who had no record of diagnosis with a mental disorder before age 5-6 years.....                                       | 8 |
| Table S8: Adjusted Odds Ratios (ORs) and 95% Confidence intervals (CI) estimating risk for mental disorder diagnoses (relative to no mental disorder) among 85,107 children who had no record of diagnosis with a mental disorder before age 5-6 years ..... | 9 |

**Table S1. Examples of items comprising the 16 subdomains (within 5 broad domains) of the AEDC (child developmental vulnerability) indicators**

|                                          |                                                                                     |
|------------------------------------------|-------------------------------------------------------------------------------------|
| <b>SOCIAL COMPETENCE</b>                 |                                                                                     |
| Overall social competence                | Gets along with peers; plays with various children                                  |
| Responsibility and respect               | Follows rules and instructions; demonstrates respect for other children             |
| Approaches to learning                   | Listens attentively; is able to solve day-to-day problems by him/herself            |
| Readiness to explore new things          | Is curious about the world; is eager to play a new game                             |
| <b>EMOTIONAL MATURITY</b>                |                                                                                     |
| Prosocial and helping behaviour          | Helps someone who has been hurt; Comforts a child who is crying or upset            |
| Anxious and fearful behaviour            | Seems to be unhappy, sad or depressed; Cries a lot                                  |
| Aggressive behaviour                     | Kicks, bites, hits other children or adults; bullies or is mean to others           |
| Hyperactive and inattentive behaviour    | Can't sit still, is restless; is distractible, has trouble sticking to any activity |
| <b>PHYSICAL HEALTH AND WELLBEING</b>     |                                                                                     |
| Physical readiness for school day        | Arrives too tired and/or too sick to do school work; arrives hungry                 |
| Physical independence                    | Is independent in toileting habits most of the time; is well co-ordinated           |
| Gross and fine motor skills              | Ability to manipulate objects; ability to climb stairs                              |
| <b>LANGUAGE AND COGNITIVE SKILLS</b>     |                                                                                     |
| Basic literacy                           | Is able to identify some letters of the alphabet; to write his/her own name         |
| Interest in literacy/numeracy and memory | Is interested in reading; is interested in games involving numbers                  |
| Advanced literacy                        | Is able to read simple words; is able to write simple words                         |
| Basic numeracy                           | Is able to count to twenty; is able to say which number is bigger of the two        |
| <b>COMMUNICATION</b>                     |                                                                                     |
| Communication and general knowledge      | Ability to use language effectively; ability to understand ... what is being said   |

**Table S2: Model fit statistics for identifying the latent class baseline model (n=82,891)**

| Number of<br>latent<br>classes | G <sup>2</sup>  | df           | AIC             | BIC             | adjusted<br>BIC | Entropy     |
|--------------------------------|-----------------|--------------|-----------------|-----------------|-----------------|-------------|
| 2                              | 62054.73        | 65502        | 62120.73        | 62428.47        | 62323.59        | 0.90        |
| 3                              | 48750.64        | 65485        | 48850.64        | 49316.91        | 49158.01        | 0.89        |
| <b>4</b>                       | <b>37735.20</b> | <b>65468</b> | <b>37869.20</b> | <b>38493.99</b> | <b>38281.06</b> | <b>0.87</b> |
| 5                              | 33473.96        | 65451        | 33641.96        | 34425.28        | 34158.33        | 0.86        |
| 6                              | 31637.27        | 65434        | 31839.27        | 32781.12        | 32460.14        | 0.86        |

Note: The 4-class solution was determined on the basis of examination of the G<sup>2</sup> statistic, the Akaike information criterion (AIC), the Bayesian information criterion (BIC), the adjusted Bayesian information (aBIC) and entropy values. The large decreases in values of G<sup>2</sup>, AIC and BIC suggested improvement in fit up to a 4-class model; models with five and six classes did not differ substantively from the 4-class solution other than identifying additional small subclasses that were not meaningful. The 4-class model was thus selected on principles of parsimony and interpretability.

**Table S3: Mean posterior probabilities and Item-response probabilities for the 4-class model of developmental vulnerability in 82,891 children**

|                                                        | Class 1:<br>No risk | Class 2:<br>Mild generalised risk | Class 3:<br>Misconduct risk | Class 4:<br>Pervasive risk |
|--------------------------------------------------------|---------------------|-----------------------------------|-----------------------------|----------------------------|
| <b>Mean posterior probabilities</b>                    |                     |                                   |                             |                            |
| Class 1: <i>No risk</i> (77.3%; n=64,097)              | <b>0.96</b> (0.08)  | 0.03 (0.07)                       | 0.01 (0.03)                 | 0.00 (0.00)                |
| Class 2: <i>Mild generalised risk</i> (11.5%; n=9,542) | 0.10 (0.14)         | <b>0.81</b> (0.18)                | 0.06 (0.10)                 | 0.03 (0.08)                |
| Class 3: <i>Misconduct risk</i> (7.0%; n=5,773)        | 0.03 (0.06)         | 0.06 (0.12)                       | <b>0.89</b> (0.15)          | 0.03 (0.07)                |
| Class 4: <i>Pervasive risk</i> (4.2%; n=3,479)         | 0.00 (0.00)         | 0.06 (0.12)                       | 0.04 (0.09)                 | <b>0.90</b> (0.15)         |
| <b>Item-response probabilities of vulnerability</b>    |                     |                                   |                             |                            |
| Overall social competence                              | 0.00                | 0.08                              | 0.29                        | <b>0.56</b>                |
| Responsibility and respect                             | 0.01                | 0.10                              | <b>0.58</b>                 | <b>0.63</b>                |
| Approaches to learning                                 | 0.00                | 0.16                              | 0.28                        | <b>0.89</b>                |
| Readiness to explore new things                        | 0.03                | 0.26                              | 0.16                        | <b>0.55</b>                |
| Prosocial and helping behaviour                        | 0.02                | 0.16                              | 0.26                        | <b>0.51</b>                |
| Anxious and fearful behaviour                          | 0.05                | 0.22                              | 0.27                        | 0.42                       |
| Aggressive behaviour                                   | 0.02                | 0.02                              | <b>0.68</b>                 | 0.37                       |
| Hyperactive and inattentive behaviour                  | 0.02                | 0.11                              | <b>0.69</b>                 | <b>0.62</b>                |
| Physical readiness for school day                      | 0.04                | 0.19                              | 0.20                        | 0.43                       |
| Physical independence                                  | 0.03                | 0.18                              | 0.13                        | 0.45                       |
| Gross and fine motor skills                            | 0.01                | 0.19                              | 0.09                        | <b>0.54</b>                |
| Basic literacy                                         | 0.01                | 0.26                              | 0.04                        | <b>0.58</b>                |
| Interest in literacy/numeracy and memory               | 0.01                | 0.20                              | 0.08                        | <b>0.61</b>                |
| Advanced literacy                                      | 0.01                | 0.19                              | 0.03                        | 0.48                       |
| Basic numeracy                                         | 0.02                | 0.38                              | 0.07                        | <b>0.67</b>                |
| Communication and general knowledge                    | 0.01                | 0.34                              | 0.08                        | <b>0.74</b>                |

Note: Standard deviation in parentheses. Mean posterior probabilities in bold type indicate classification accuracy when assigning children to the latent classes; values closer to 1.00 indicate greater precision. Item-response probabilities in bold type indicate values >0.5.

**Table S4: ICD-10 codes used to define mental diagnoses of parents of the child cohort (categories are not mutually exclusive).**

| Broad Diagnostic Group                 | Diagnostic categories                           | ICD-10 codes                                                                                                | N (Any parent) |
|----------------------------------------|-------------------------------------------------|-------------------------------------------------------------------------------------------------------------|----------------|
| Any Mental Disorder                    | Any one of the diagnoses listed below           | Any one of the F-codes listed below                                                                         | 17,653         |
| <b>Severe Mental Disorders</b>         | Schizophrenia Spectrum Disorders                | F20, F22, F23, F24, F25, F25.0, F25.1, F25.2, F25.8, F25.9, F28, F29.                                       | 1,615          |
|                                        | Bipolar Disorders                               | F30, F31                                                                                                    | 1,121          |
|                                        | Psychotic Disorders related to Substance Use    | F10.5, F11.5, F12.5, F13.5, F14.5, F15.5, F15.50, F15.51, F15.59, F15.70, F16.5, F17.5, F18.5, F19.5, F19.7 | 527            |
| <b>Common Mental Disorders</b>         | Non-psychotic Affective Disorders               | F32, F33, F34, F34.8, F34.9, F38.0, F38.1, F38.8, F39                                                       | 7,387          |
|                                        | Neurotic and stress-related (anxiety) disorders | F40, F41, F42, F43, F44, F45, F48.                                                                          | 9,045          |
| <b>Personality Disorders</b>           | Cluster A                                       | F21, F60.0, F60.1                                                                                           | 50             |
|                                        | Cluster B                                       | F60.2, F60.3, F60.30, F60.31, F60.4                                                                         | 934            |
|                                        | Cluster C                                       | F60.5, F60.6, F60.7                                                                                         | 162            |
|                                        | Other Personality Disorders                     | F60, F60.8, F60.09, F60.9, F61, F62, F62.0, F62.1, F62.8, F62.9, F68.0, F68.1, F68.8, F69                   | 1004           |
| <b>Substance Use Disorders</b>         | Substance Intoxication and Use Disorders        | F10, F11, F12, F13, F14, F15 F16, F17, F18, F19, F55.9                                                      | 6,819          |
| <b>Other Adult Onset Disorders</b>     | Other Adult Onset Disorders                     | F00, F01, F03, F04, F05, F06, F07, F09, F50, F51, F52, F53, F54, F55, F59, F63, F64, F65, F66, F99          | 9,637          |
| <b>Other Childhood Onset Disorders</b> | Other Childhood Onset Disorders                 | F70, F71, F73, F78, F79, F80, F81, F82, F83, F84, F88, F89, F90, F91, F92, F93, F94, F95, F98.              | 866            |

**Table S5: ICD-10 codes used to define Mental Health conditions experienced by the child cohort<sup>a</sup> (categories are not mutually exclusive).**

|                                                  |                                       | ICD-10 codes                                                                                                                                                              | (n)<br>From Child's birth<br>to age 13yrs | (n)<br>Child age<br>6-13yrs <sup>b</sup> | (n)<br>Child age<br>6-13yrs only <sup>c</sup> |
|--------------------------------------------------|---------------------------------------|---------------------------------------------------------------------------------------------------------------------------------------------------------------------------|-------------------------------------------|------------------------------------------|-----------------------------------------------|
| <b>ANY MENTAL DISORDER</b>                       |                                       | Any F-Code evident in MHAMB, APDC, or EDDC records plus R45.81, X84 (self harm)                                                                                           | 4689                                      | 3531                                     | 3074                                          |
| <b>Anxiety, Stress &amp; Emotional Disorders</b> | Phobias and Anxiety                   | F40, F40.0, F40.01, F40.1, F40.2, F40.8, F40.9, F40.0PC, F40.10, F40.2, F40.210, F40.248, F41, F41.0, F41.1, F41.2, F41.3, F41.8, F41.9, F41.0P, F41.2P, F41.0PC, F41.2PC | 620                                       | 590                                      | 545                                           |
|                                                  | Stress Reactions                      | F43, F43.0, F43.1, F43.12, F43.2, F43.20, F43.21, F43.22, F43.23, F43.24, F43.25, F43.29, F43.8, F43.9                                                                    | 233                                       | 215                                      | 152                                           |
|                                                  | Childhood Onset Emotional Disorders   | F93, F93.0, F93.1, F93.2, F93.3, F93.8, F93.9                                                                                                                             | 222                                       | 189                                      | 187                                           |
| <b>Hyperkinetic and Conduct Disorders</b>        | Hyperkinetic Disorders                | F90, F90.0, F90.1, F90.8, F90.9                                                                                                                                           | 250                                       | 231                                      | 200                                           |
|                                                  | Conduct Disorders                     | F91, F91.0, F91.1, F91.2, F91.3, F91.8, F91.9, F91#                                                                                                                       | 372                                       | 301                                      | 259                                           |
| <b>Developmental Disorders</b>                   | Developmental Disorders               | F80, F80.0, F80.1, F80.2, F80.3, F80.8, F80.9, F80.45, F81, F81.0, F81.1, F81.2, F81.3, F81.8, F81.9, F82, F83                                                            | 684                                       | 472                                      | 342                                           |
|                                                  | Autism Spectrum Disorders             | F84, F84.0, F84.1, F84.2, F84.3, F84.4, F84.5, F84.8, F84.9                                                                                                               | 385                                       | 315                                      | 229                                           |
|                                                  | Developmental Disorders Unspecified   | F88, F89                                                                                                                                                                  | 301                                       | 140                                      | 98                                            |
| <b>Other Non-diagnostic</b>                      | Self Harm                             | R45.81, X84                                                                                                                                                               | 105                                       | 104                                      | 99                                            |
|                                                  | Mental Health Diagnoses not allocated | F99, F99.1                                                                                                                                                                | 2898                                      | 2496                                     | 2175                                          |

<sup>a</sup>Records for child include all received within the Emergency Department (2005-2016), Admitted Patient (2001-2016) and Mental Health Ambulatory (2001-2016) record collections from the NSW Ministry of Health; <sup>b</sup>Records for child restricted to age 6-13 years (i.e., 2010- 2016) for the entire NSW-CDS (Wave 2) child cohort (n=91,635); <sup>c</sup>Records for child restricted to age 6-13 years (i.e., January 2009 - December 2016) for the entire NSW-CDS (Wave 2) child cohort (N=91,635); <sup>d</sup>Records for child restricted to age 6-13 years (i.e., January 2009 - December 2016) and exclude children who had a mental disorder diagnosed with a mental disorder prior to the 2009 AEDC (N=90,020).

**Table S6. Prevalence of Early Childhood (AEDC) Risk Categories, diagnosed mental disorder (between age 6-13 years), and covariates for the sample of 85,107 children who had no record of diagnosis with a mental disorder before age 5-6 years.**

|                                             | <b>N (%) within total child cohort (85,107)</b> |
|---------------------------------------------|-------------------------------------------------|
| <b>AEDC Early Childhood Risk Categories</b> |                                                 |
| Established Special Needs Status            | 3,389 (4.0)                                     |
| Pervasive risk                              | 3,408 (4.0)                                     |
| Misconduct risk                             | 5,625 (6.6)                                     |
| Mild generalised risk                       | 9,424 (11.1)                                    |
| No risk                                     | 63,261 (74.3)                                   |
| <b>Childhood mental disorder</b>            |                                                 |
| Any mental disorder                         | 2,899 (3.4)                                     |
| Phobias and Anxiety                         | 518 (0.6)                                       |
| Childhood Onset Emotional Disorders         | 145(0.2)                                        |
| Stress Reactions                            | 173 (0.2)                                       |
| Hyperkinetic Disorders                      | 186 (0.2)                                       |
| Conduct Disorders                           | 248 (0.3)                                       |
| Developmental Disorders (inc. Autism)       | 328 (0.4)                                       |
| Autism Spectrum Disorders                   | 221 (0.3)                                       |
| Self Harm                                   | 93 (0.1)                                        |
| <b>Covariates</b>                           |                                                 |
| Child sex (male)                            | 43,861 (51.5)                                   |
| Socioeconomic Disadvantage                  | 21,078 (24.8)                                   |
| Childhood protection contacts               | 20,161 (23.7)                                   |
| Parental mental illness                     | 17,021 (20.0)                                   |

Note: AEDC=Australian Early Development Census

**Table S7: Unadjusted Odds ratios (and 95% Confidence Intervals) for ‘any’ and specific mental disorder diagnoses among 85,107 children who had no record of diagnosis with a mental disorder before age 5-6 years**, in association with early childhood developmental risk categories (‘pervasive’, ‘misconduct’, and ‘mild generalised’ risk) or those with established ‘special needs’, relative to the ‘no risk’ category.

|                                      |                                 | Early Childhood (AEDC) Risk Category |                     |  |                 |                     |                       |             |                    |
|--------------------------------------|---------------------------------|--------------------------------------|---------------------|--|-----------------|---------------------|-----------------------|-------------|--------------------|
|                                      |                                 | Overall model fit                    | Pervasive risk      |  | Misconduct Risk |                     | Mild generalised risk |             | Special Needs      |
| Any mental disorder                  | $\chi^2=1023.65, df=4, p<0.001$ | <b>3.21</b>                          | <b>(2.79-3.69)</b>  |  | <b>3.01</b>     | <b>(2.68-3.38)</b>  |                       | <b>1.49</b> | <b>(1.31-1.66)</b> |
| Phobias and Anxiety                  | $\chi^2=34.79, df=4, p<0.001$   | 1.44                                 | (0.97-2.13)         |  | 1.29            | (0.93-1.79)         |                       | 1.02        | (0.76-1.36)        |
| Childhood Emotional Disorders        | $\chi^2=40.63, df=4, p<0.001$   | <b>2.92</b>                          | <b>(1.62-5.23)</b>  |  | <b>2.58</b>     | <b>(1.57-4.25)</b>  |                       | 0.89        | (0.47-1.67)        |
| Stress Reactions                     | $\chi^2=59.55, df=4, p<0.001$   | <b>4.19</b>                          | <b>(2.58-6.81)</b>  |  | <b>3.55</b>     | <b>(2.32-5.43)</b>  |                       | 1.35        | (0.82-2.26)        |
| Hyperkinetic Disorders               | $\chi^2=277.68, df=4, p<0.001$  | <b>10.16</b>                         | <b>(6.23-16.54)</b> |  | <b>12.33</b>    | <b>(8.25-18.41)</b> |                       | 2.34        | (1.32-4.13)        |
| Conduct Disorders                    | $\chi^2=207.10, df=4, p<0.001$  | <b>6.04</b>                          | <b>(4.02-9.07)</b>  |  | <b>5.66</b>     | <b>(4.00-8.02)</b>  |                       | 1.54        | (0.97-2.44)        |
| Developmental Disorders <sup>a</sup> | $\chi^2=963.02, df=4, p<0.001$  | <b>11.67</b>                         | <b>(7.40-18.09)</b> |  | <b>6.84</b>     | <b>(3.92-11.92)</b> |                       | <b>3.64</b> | <b>(2.26-5.87)</b> |
| Autism Spectrum Disorders            | $\chi^2=687.20, df=4, p<0.001$  | <b>10.17</b>                         | <b>(5.72-17.05)</b> |  | <b>6.84</b>     | <b>(3.92-11.92)</b> |                       | 2.24        | (1.13-4.43)        |
| Self Harm                            | $\chi^2=29.34, df=4, p<0.001$   | <b>4.36</b>                          | <b>(2.26-8.40)</b>  |  | <b>3.60</b>     | <b>(2.01-6.44)</b>  |                       | 1.88        | (1.01-3.44)        |

Note: bolded ORs are significant at  $p<0.001$ ; <sup>a</sup>Includes Autism Spectrum and Developmental Disorders Unspecified; AEDC=Australian Early Development Census.



**Table S8: Adjusted Odds Ratios (ORs) and 95% Confidence intervals (CI) estimating risk for mental disorder diagnoses (relative to no mental disorder) among 85,107 children who had no record of diagnosis with a mental disorder before age 5-6 years** in association with early childhood developmental risk profiles ('pervasive', 'misconduct', and 'mild generalised risk') or those with established 'special needs', relative to the no risk profile (adjusted for male sex, socioeconomic disadvantage, parental mental illness history, child protection contacts), among 85,107 children *who had no record of diagnosis with a mental disorder before age 5-6 years*.

| Multinomial Logistic<br>Regression Outcome | Early childhood (AEDC) Risk Category |                          |                         |                            |                          | Covariates              |                         |                            |
|--------------------------------------------|--------------------------------------|--------------------------|-------------------------|----------------------------|--------------------------|-------------------------|-------------------------|----------------------------|
|                                            | Pervasive risk                       | Misconduct risk          | Mild generalised risk   | Special Needs              | Child Protection contact | Parental Mental Illness | Male sex                | Socioeconomic disadvantage |
| Any mental disorder                        | <b>1.99 (1.72-2.29)</b>              | <b>2.07 (1.83-2.34)</b>  | 1.13 (0.99-1.27)        | <b>4.15 (3.68-4.67)</b>    | <b>3.10 (2.85-3.37)</b>  | <b>1.95 (1.79-2.11)</b> | <b>1.25 (1.15-1.35)</b> | 1.06 (0.97-1.15)           |
| Phobias and Anxiety                        | 1.10 (0.74-1.65)                     | 1.08 (0.77-1.50)         | 0.87 (0.65-1.17)        | <b>2.18 (1.60-2.97)</b>    | <b>2.01 (1.65-2.44)</b>  | <b>1.84 (1.51-2.32)</b> | 0.85 (0.72-1.02)        | 1.08 (0.89-1.32)           |
| Emotional Disorders                        | 1.80 (0.99-3.29)                     | 1.78 (1.06-2.97)         | 0.67 (0.36-1.27)        | <b>2.93 (1.75-4.90)</b>    | <b>3.29 (2.28-4.76)</b>  | <b>2.15 (1.51-3.06)</b> | 1.07 (0.76-1.50)        | 1.26 (0.87-1.85)           |
| Stress Reactions                           | 2.07 (1.25-3.41)                     | <b>2.06 (1.33-3.20)</b>  | 0.88 (0.53-1.47)        | 2.16 (1.29-3.63)           | <b>5.63 (3.89-8.17)</b>  | <b>2.64 (1.91-3.64)</b> | 1.14 (0.83-1.55)        | 0.90 (0.65-1.23)           |
| Hyperkinetic Disorders                     | <b>5.32 (3.22-8.81)</b>              | <b>7.21 (4.76-10.91)</b> | 1.64 (0.92-2.91)        | <b>11.78 (7.76-17.88)</b>  | <b>3.79 (2.71-5.30)</b>  | <b>1.54 (1.13-2.10)</b> | <b>2.18 (1.53-3.11)</b> | 0.96 (0.70-1.30)           |
| Conduct Disorders                          | <b>2.81 (1.85-4.27)</b>              | <b>3.07 (2.14-4.39)</b>  | 0.99 (0.62-1.58)        | <b>5.40 (3.80-7.70)</b>    | <b>5.98 (4.36-8.18)</b>  | <b>2.00 (1.53-2.60)</b> | <b>1.70 (1.28-2.24)</b> | 0.90 (0.69-1.18)           |
| Developmental Disorders <sup>a</sup>       | <b>7.78 (4.87-12.44)</b>             | <b>4.70 (2.92-7.56)</b>  | <b>2.96 (1.83-4.80)</b> | <b>58.03 (41.72-80.71)</b> | <b>2.25 (1.76-2.87)</b>  | 1.44 (1.12-1.83)        | <b>1.73 (1.33-2.45)</b> | 0.95 (0.75-1.21)           |
| Autism Spectrum Disorders                  | <b>6.50 (3.60-11.72)</b>             | <b>4.67 (2.65-8.24)</b>  | 1.79 (0.90-3.57)        | <b>56.53 (37.99-84.13)</b> | <b>2.34 (1.66-3.01)</b>  | 1.51 (1.12-2.02)        | <b>2.14 (1.53-3.01)</b> | 0.92 (0.69-1.23)           |
| Self Harm                                  | 2.18 (1.11-4.28)                     | 2.18 (1.20-3.96)         | 1.20 (0.65-2.24)        | 1.65 (0.73-3.70)           | <b>7.49 (4.43-12.65)</b> | 1.90 (1.24-2.92)        | 0.86 (0.57-1.31)        | 0.76 (0.50-1.16)           |

Note: bolded ORs are significant at  $p < 0.001$ ; AEDC=Australian Early Development Census; <sup>a</sup>Includes Autism Spectrum and Developmental Disorders Unspecified; Chi-square fit statistics for overall models: Any mental disorder ( $\chi^2=2403.73$ ,  $df=8$ ,  $p < 0.001$ ), Phobias and anxiety ( $\chi^2=165.78$ ,  $df=8$ ,  $p < 0.001$ ), Emotional Disorders ( $\chi^2=126.70$ ,  $df=8$ ,  $p < 0.001$ ), Stress Reactions ( $\chi^2=256.34$ ,  $df=8$ ,  $p < 0.001$ ), Hyperkinetic Disorders ( $\chi^2=394.21$ ,  $df=8$ ,  $p < 0.001$ ), Conduct Disorders ( $\chi^2=460.58$ ,  $df=8$ ,  $p < 0.001$ ), Developmental Disorders ( $\chi^2=1045.28$ ,  $df=8$ ,  $p < 0.001$ ), Autism Spectrum Disorders ( $\chi^2=759.14$ ,  $df=8$ ,  $p < 0.001$ ), and Self Harm ( $\chi^2=139.82$ ,  $df=8$ ,  $p < 0.001$ ).
